# Supplementary material
Source: PubMed Central journal article supplement (PMC3172186)

**A.**

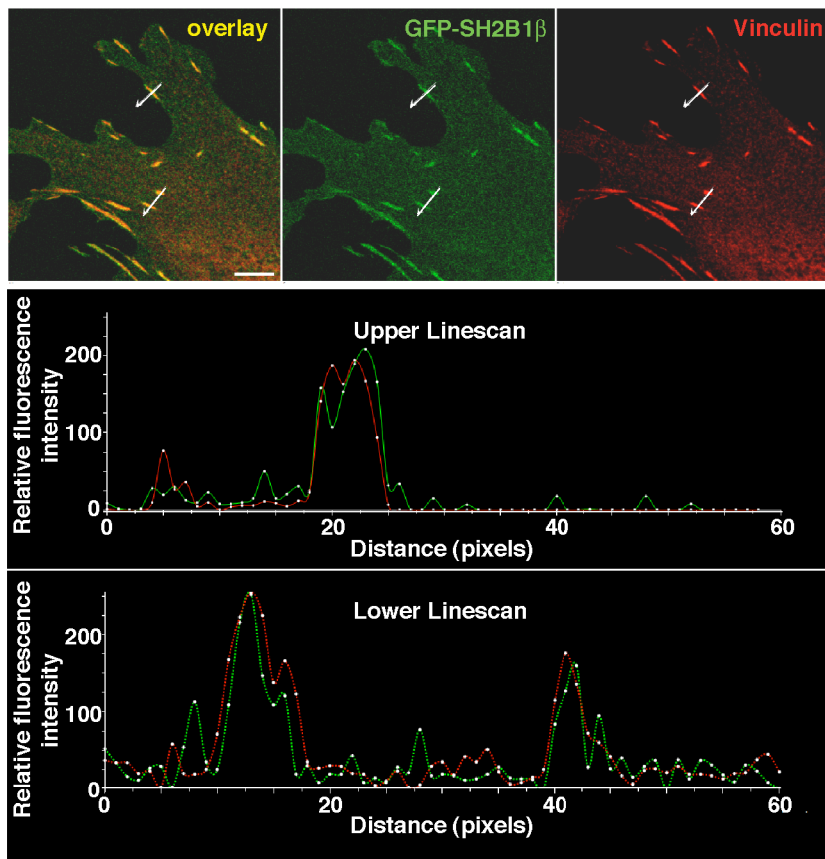

**B.**

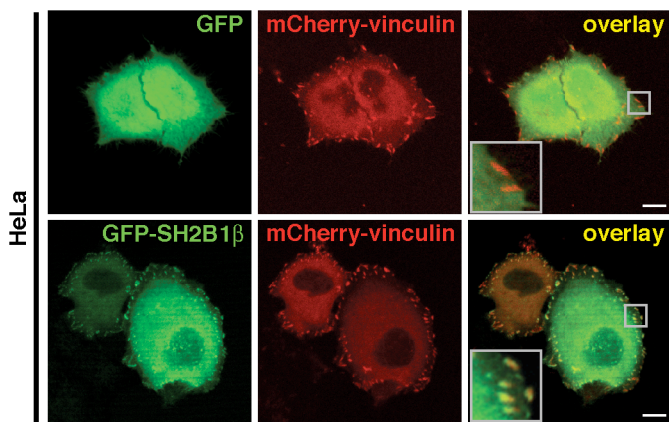

Supplement: supp_124.18.3095_JCS081547FigS1.pdf [file supp_124.18.3095_JCS081547FigS1.pdf]
